# Supplementary material
Source: PubMed Central journal article supplement (PMC4777680)
Supplement: NIHMS746249-supplement-10585_2015_9775_MOESM1_ESM.pdf [file NIHMS746249-supplement-10585_2015_9775_MOESM1_ESM.pdf]

# Figure S1

|   | Tumor size | ER | PR | Her-2 | LN+   |      | Site of Met |
|---|------------|----|----|-------|-------|------|-------------|
| A | 3          | -  | -  | 1+    | 0/15  |      | -           |
| B | 9          | -  | -  | 2+    | 12/15 |      | -           |
| C | 3.5        | -  | -  | 3+    | 0/10  | DCIS | -           |
| D | 5          | +  | +  | 0     | 5/24  | DCIS | -           |
| E | 7          | -  | -  | 0     | 7/21  |      | Liver, bone |
| F | 1.5        | +  | +  | 0     | 1/1   |      | Distant LN  |
| G | 1.1        | +  | -  | 0     | 0/11  |      | Bone        |
